# Supplementary material for: Development and Application of a High-Throughput Method for the Purification and Analysis of Surface Carbohydrates from Klebsiella pneumoniae
Source: MDPI journal article supplement (doi:10.3390/biology13040256), 2024-04-12
Supplement: s1 [file s1]

## Supplementary Information

### **Development and application of a high-throughput method for the purification and analysis of surface carbohydrates from *Klebsiella pneumoniae***

Francesca Nonne<sup>1</sup>, Mariagrazia Molfetta<sup>1</sup>, Rebecca Nappini<sup>1,2</sup>, Chiara La Guidara<sup>1</sup>, Roberta Di Benedetto<sup>1</sup>, Siwaphiwe Mfana<sup>3</sup>, Barbara Bellich<sup>4\*</sup>, Maria Michelina Raso<sup>1</sup>, Gianmarco Gasperini<sup>5</sup>, Renzo Alfini<sup>1</sup>, Paola Cescutti<sup>2</sup>, Francesco Berlanda Scorza<sup>1</sup>, Neil Ravenscroft<sup>3</sup>, Francesca Micoli<sup>1</sup>, Carlo Giannelli<sup>1</sup>

<sup>1</sup>GSK Vaccines Institute for Global Health, Siena, Italy

<sup>2</sup>Department of Life Science, University of Trieste, Trieste, Italy

<sup>3</sup>Department of Chemistry, University of Cape Town, South Africa.

<sup>4</sup>Department of Advanced Translational Diagnostics, Institute for Maternal and Child Health, IRCCS "Burlo Garofolo", Trieste, Italy

<sup>5</sup>GSK, Siena, Italy

\* When the experiments were performed BB was working at the Department of Life Sciences, University of Trieste, Trieste, Italy

**Table S1.** Evaluation of OAc level after KAg purification

| KAg type | Strain    | Extraction method | OAc % |
|----------|-----------|-------------------|-------|
| K2       | NCTC13810 | H <sub>2</sub> O  | ~55%  |
|          | NCTC13810 | AcOH              | ~45%  |
|          | NCTC11228 | AcOH              | ~98%  |
|          | 5765B     | H <sub>2</sub> O  | ~77%  |

**Table S2:** Complete <sup>1</sup>H and <sup>13</sup>C NMR chemical shifts data of the sugar residues in the polysaccharide produced by strain 4998 (identified as O-acetylated K2) with glycosylation shifts shown in brackets below the carbon chemical shifts; the linkage carbons are underlined.

| Residue                           | H1<br>C1                 | H2<br>C2                 | H3<br>C3                       | H4<br>C4                       | H5<br>C5                 | H6<br>C6                       | OAc                     |
|-----------------------------------|--------------------------|--------------------------|--------------------------------|--------------------------------|--------------------------|--------------------------------|-------------------------|
| <b>A</b><br>→4)-α-D-Glcp-(1→      | 5.28<br>99.79<br>(6.80)  | 3.61<br>72.27<br>(-0.20) | 3.86<br>72.39<br>(-1.39)       | 3.66<br><u>80.13</u><br>(9.42) | 4.05<br>71.21<br>(-1.16) | 3.75; 3.79<br>60.87<br>(-0.97) | -                       |
| <b>B</b><br>α-D-GlcpA-(1→         | 5.17<br>102.04<br>(9.08) | 3.53<br>72.65<br>(0.39)  | 3.79<br>74.40<br>(0.88)        | 3.51<br>72.72<br>(-0.19)       | 4.10<br>73.45<br>(0.98)  | -<br>176.89<br>(-0.53)         | -                       |
| <b>C</b><br>→3,4)-β-D-Manp6Ac-(1→ | 4.78<br>100.86<br>(6.31) | 4.23<br>71.42<br>(-0.71) | 3.86<br><u>81.14</u><br>(7.11) | 4.12<br><u>73.21</u><br>(5.52) | 3.80<br>73.79<br>(-3.21) | 4.66; 4.31<br>63.51<br>(1.52)  | 2.17<br>21.13<br>174.61 |
| <b>D</b><br>→3)-β-D-Glcp-(1→      | 4.47<br>103.20<br>(6.36) | 3.39<br>73.03<br>(-2.17) | 3.63<br><u>83.92</u><br>(7.16) | 3.56<br>70.91<br>(0.20)        | 3.50<br>77.18<br>(0.42)  | 3.75; 3.97<br>61.76<br>(-0.08) | -                       |

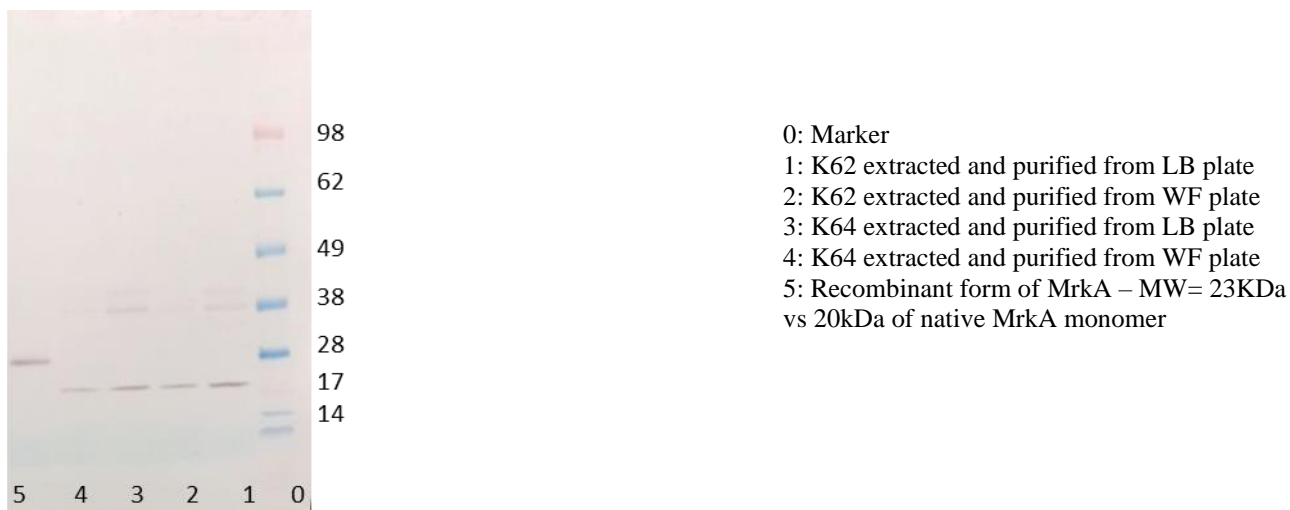

**Figure S1.** Western Blot analyses shows recognition of K62 and K64 samples by an anti-MrkA antibody confirming the presence of MrkA protein in the purified KAgS.

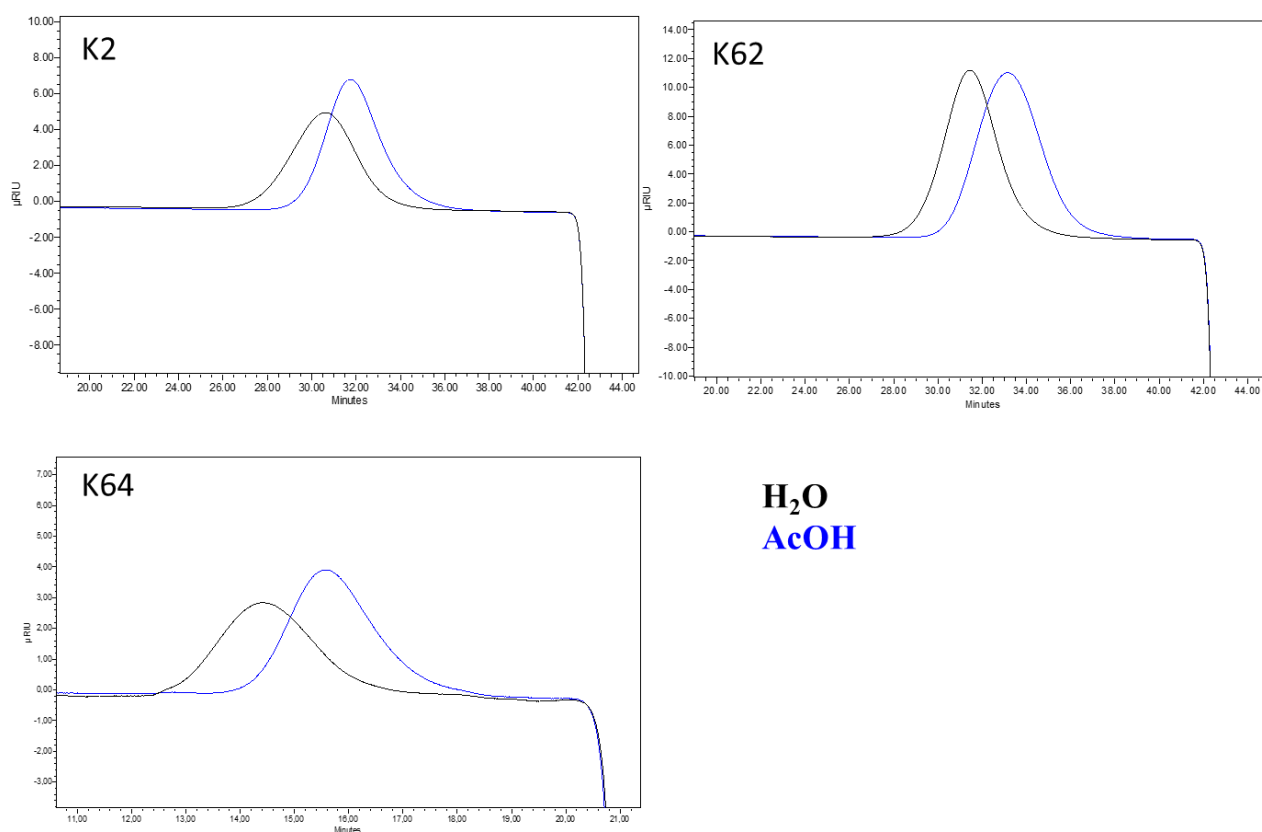

**Figure S2.** HPLC-SEC profiles highlight differences in the size of purified K-Ag obtained from bacterial extraction with and without AcOH.

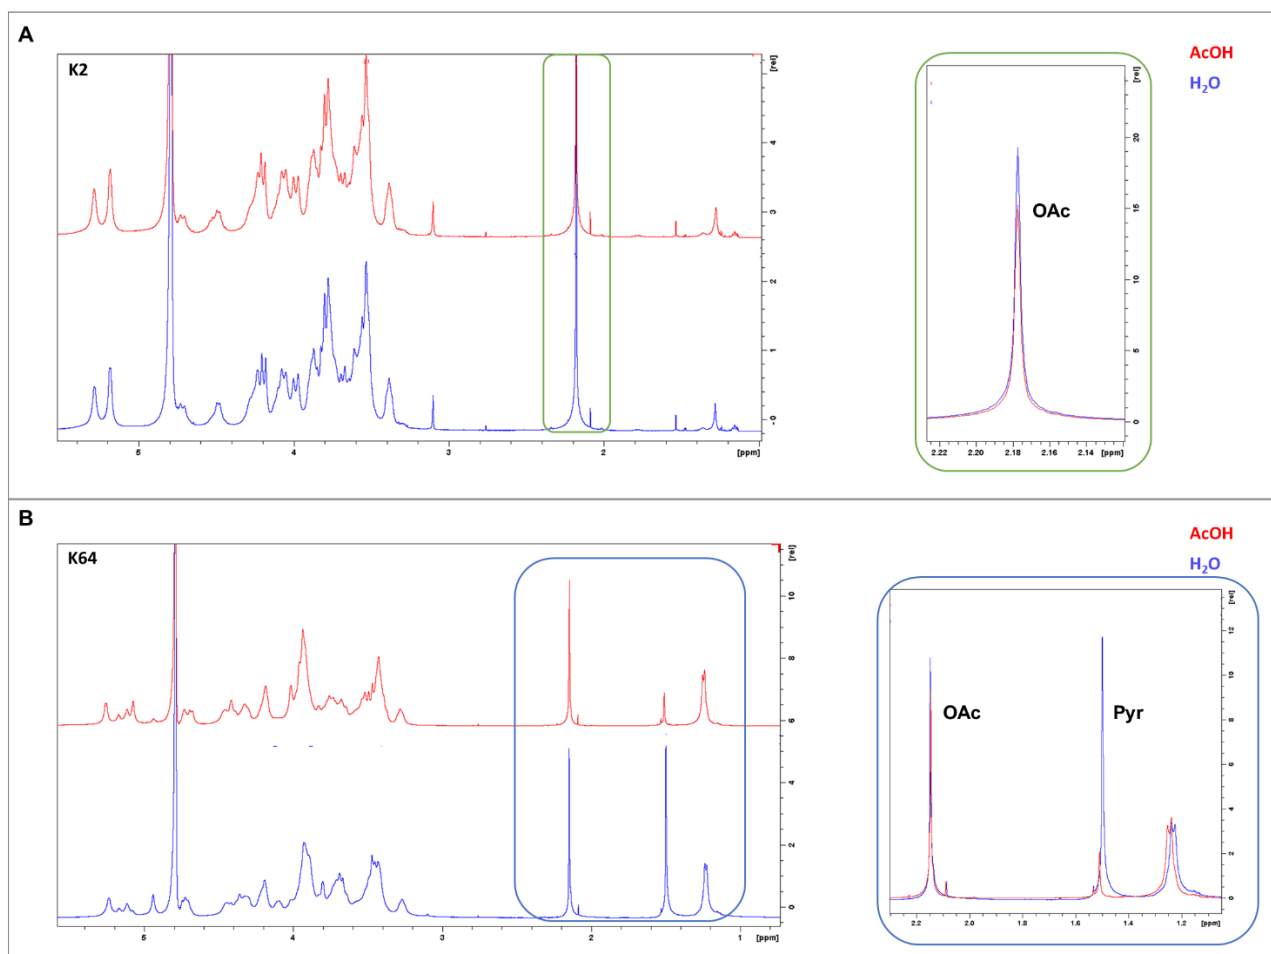

**Figure S3.** Impact of AcOH on K2 (A) and K64 (B) PS structure integrity by NMR analysis

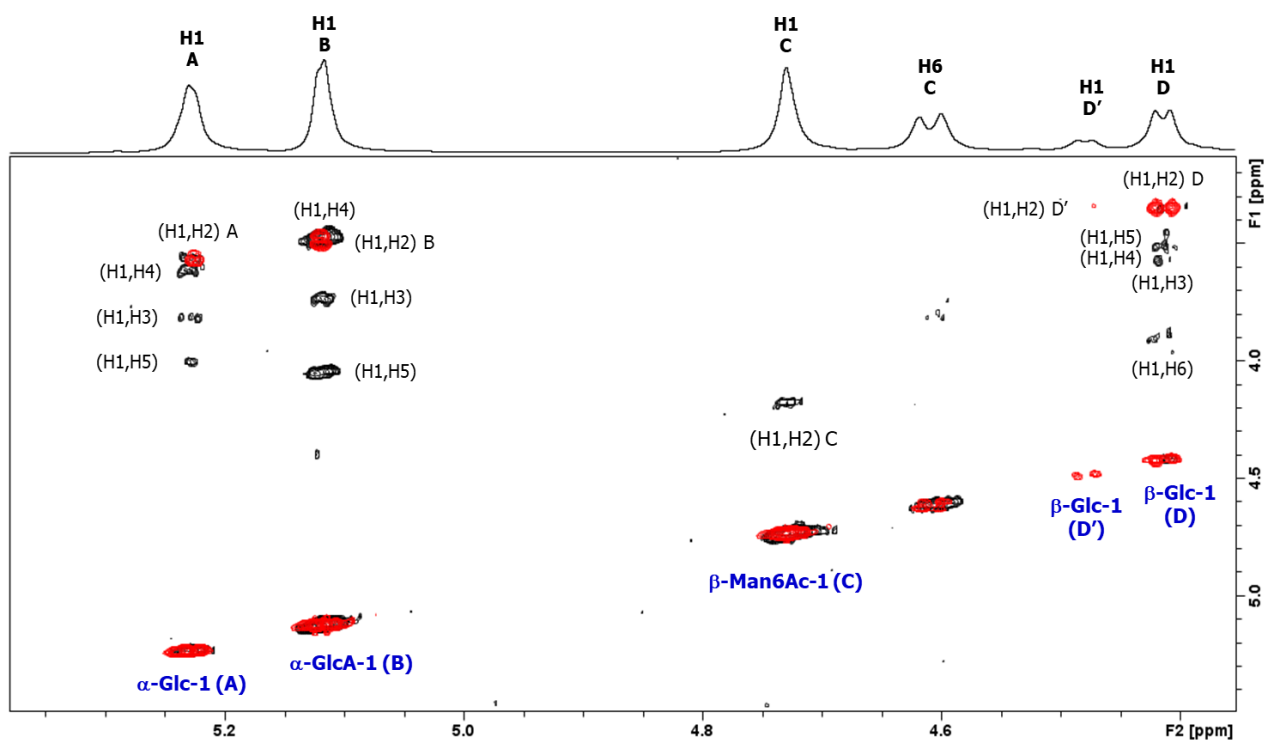

**Figure S4.**  $^1\text{H}$ - $^1\text{H}$  NMR COSY (red)/TOCSY (black) overlay of the anomeric region of K-Ag from strain 4998 recorded at 600 MHz and 343 K. The crosspeaks for the O-acetylated tetrasaccharide RU are labeled (A =  $\alpha$ -Glc, B =  $\alpha$ -GlcA, C =  $\beta$ -Man6Ac and D =  $\beta$ -Glc).

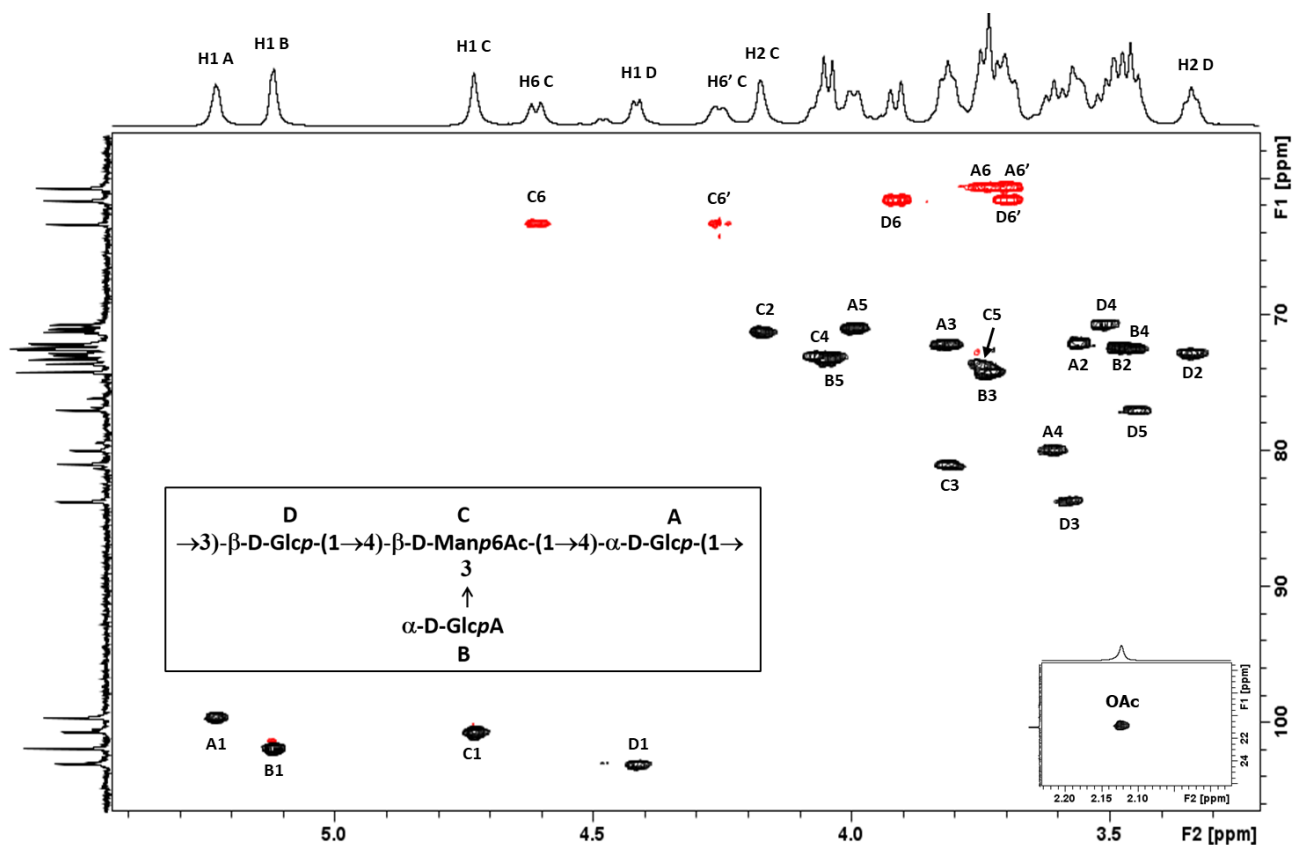



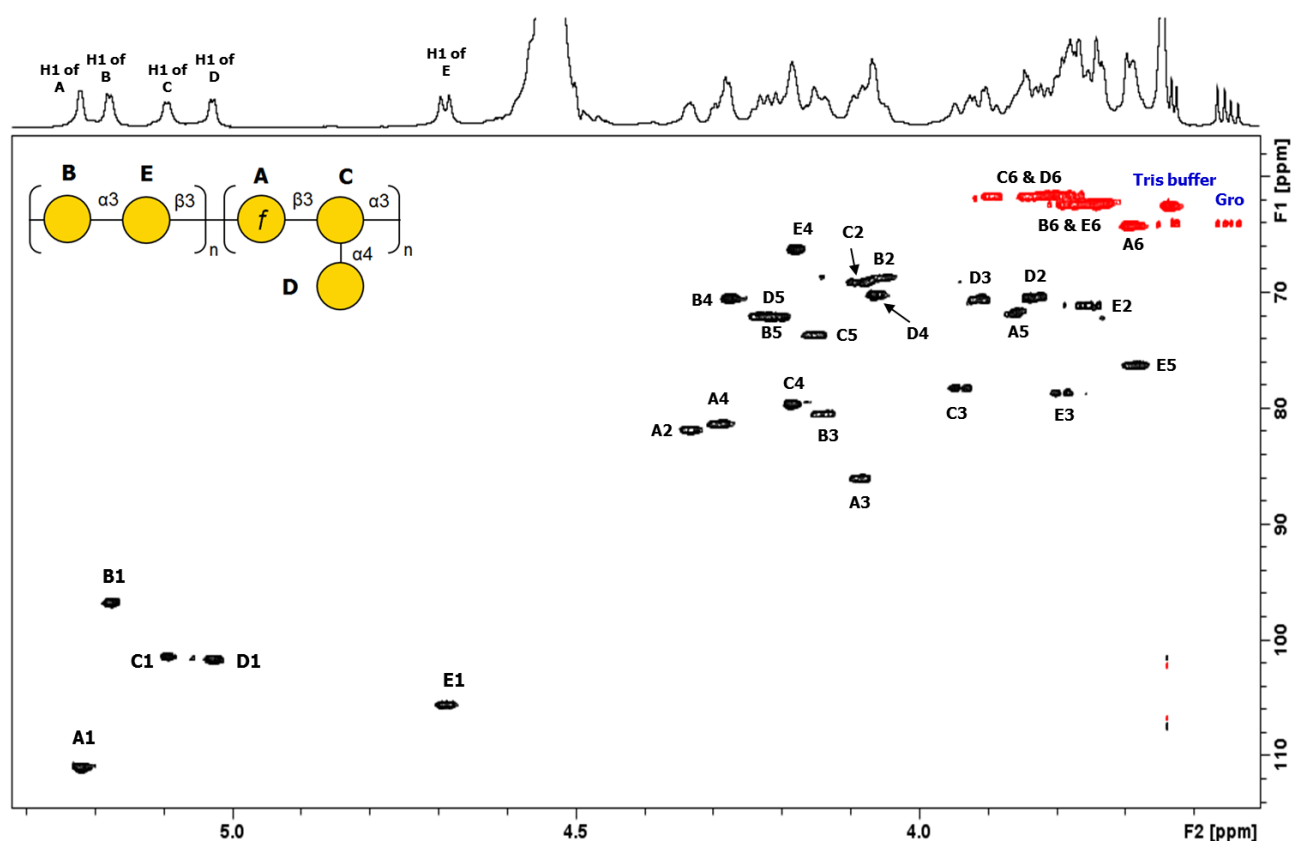

**Figure S7.** The HSQC-DEPT spectrum of O-Ag from strain 7008B recorded at 600 MHz and 323 K, methylene signals are inverted (in red). All the pentasaccharide repeat unit proton/carbon crosspeaks have been labeled according to the carbon atom of the corresponding residue in the RU (A =  $\beta$ -3Gal, B =  $\alpha$ -3Gal, C =  $\alpha$ -3,4Gal, D =  $\alpha$ -Gal and E =  $\beta$ -3Gal). Additional peaks are due to buffer and glycerol (Gro).
